# Supplementary material for: Utilization of hepatitis B surface antigen-positive donors in liver transplantation for recipients with hepatocellular carcinoma: a retrospective and propensity score matching analysis
Source: PeerJ. 2023 Jul 26;11:e15620. doi: 10.7717/peerj.15620 (PMC10386819; doi:10.7717/peerj.15620)
Supplement: Data S1 [file peerj-11-15620-s001.xlsx]

## Sheet: Sheet1
Recipients' characteristics																							Donors' characteristics
date of transplant	ID	group	gender	age	height	weight	BMI	RFA history	TACE history	CREA	ALB	TBIL	INR	AFP	AFP>400	MELD score	Child-Pugh score	HBsAg	HBV-DNA	DNA>100	DBD	TNM staging	gender	age	weight	height	BMI	TBIL	AST	ALT	HBsAg
2015-01-22	1	1	0	52	165	51	18.7328	0	0	89	47.5	43	1.57	428.34	1	15	9	1	0	0	1	1	1	42	73	165	26.8136	41.5	181	55	1
2015-05-06	2	1	0	53	170	57	19.7232	0	1	206	44.9	103.6	4.36	5.97	0	38	9	1	0	0	1	1	1	44	75	175	24.4898	20.8	23	7	1
2015-10-28	3	1	0	66	171	62	21.2031	0	0	79	39.9	22.5	1.12	3.53	0	9	8	1	0	0	0	2	0	19	51	152	22.0741	19.9	42	110	1
2017-03-26	4	1	0	62	168	71	25.1559	1	0	81	39.6	28.4	1.19	1.94	0	10	5	1	100	0	0	1	1	35	60	170	20.7612	12.7	102	149	1
2017-05-05	5	1	1	39	165	59	21.6713	0	1	50	35.7	9.3	0.9	5831.73	1	6	5	1	100	0	1	2	0	29	50	156	20.5457	16.2	35	23	1
2017-09-08	7	1	0	55	180	74	22.8395	0	0	91	39	12	0.98	84.61	0	7	5	1	100	0	0	2	1	27	65	170	22.4913	7	37	49	1
2016-11-16	8	1	0	60	170	69	23.8754	0	0	71	73.1	29	1.19	2	0	10	6	1	0	0	1	2	1	33	60	175	19.5918	10.1	397	132	1
2017-09-06	9	1	0	41	175	70	22.8571	0	1	80	39.7	15.8	1.14	3.73	0	8	5	1	100	0	1	1	1	43	67	168	23.7387	41	52	29	1
2017-05-22	10	1	0	40	170	59	20.4152	0	1	59	43	20.9	1.11	9.41	0	8	6	1	100	0	1	2	1	40	73	170	25.2595	33.9	149	257	1
2017-10-26	11	1	0	62	170	67.5	23.3564	0	0	114	41	14.2	1.01	2.34	0	9	6	1	100	0	1	2	1	34	65	165	23.8751	33.7	37	24	1
2015-10-17	12	1	0	65	163	54	20.3244	0	1	167	40.1	117.9	1.78	5.65	0	26	6	1	0	0	1	1	1	3	15	100	15	2.5	63	73	1
2018-03-13	13	1	0	46	170	61.5	21.2803	0	0	56	39.4	422.1	2.85	21.42	0	30	11	1	1150000	1	1	2	1	24	62	175	20.2449	13.8	31	37	1
2017-05-26	14	1	0	58	165	65	23.8751	0	0	55	26	18.8	1.27	25.84	0	9	8	1	2380000	1	0	2	0	48	60	158	24.0346	6.3	42	40	1
2017-07-19	16	1	0	38	165	67	24.6097	0	0	52	35.9	42.9	1.21	581.1	1	12	7	1	2090	1	1	3	0	21	66	163	24.841	36.3	14	17	1
2016-12-19	17	1	0	65	170	70	24.2215	0	0	77	33.8	11.4	1.11	3452.29	1	8	6	1	14500	1	0	3	1	48	65	165	23.8751	13.34	60	50	1
2016-10-13	18	1	0	56	168	60	21.2585	0	0	90	18.6	156.4	1.4	154.77	0	19	11	1	0	0	1	2	1	18	60	160	23.4375	29	62	55	1
2017-10-30	19	1	0	51	168	70	24.8016	0	1	61	31	22.8	1.19	12.46	0	9	8	1	0	0	1	2	1	27	65	172	21.9713	15.9	100	74	1
2018-08-11	20	1	0	72	170	63	21.7993	0	0	79	33	37.5	1.01	7.73	0	10	6	1	0	0	1	1	1	21	65	168	23.03	14.27	72.5	53.9	1
2018-08-19	21	1	1	62	155	62	25.8065	0	1	76	32.1	12	1.12	523.27	1	8	6	1	298000	1	1	2	0	47	49	158	19.6283	35.8	145	149	1
2017-11-07	22	1	0	64	163	66	24.841	1	1	83	28.8	238.6	1.27	41.62	0	19	9	1	100	0	1	2	1	51	60	170	20.7612	35.8	145	149	1
2016-06-13	23	1	1	58	165	55	20.202	1	1	56	32.5	29	1.03	5.25	0	9	6	1	0	0	1	1	1	41	55	165	20.202	12.6	48	36	1
2018-09-21	24	1	0	28	175	78	25.4694	0	0	78	39.6	11	1.05	6.49	0	7	5	1	100	0	1	2	1	46	65	170	22.4913	16.2	96	23	1
2019-02-13	25	1	0	51	172	73	24.6755	0	0	260	37.4	346	1.21	423	1	30	9	1	0	0	1	2	1	45	55	170	19.0311	68.1	49	28	1
2019-09-28	26	1	0	62	164	53	19.7055	0	0	152	36.2	662	2.27	3.76	0	35	10	1	0	0	1	1	1	41	70	160	27.3437	15.1	39	28	1
2018-07-18	27	1	0	65	168	58	20.5499	0	0	290	32	256	2	1219.84	1	36	11	1	0	0	1	1	1	31	70	172	23.6614	12.9	47	19	1
2018-10-30	28	1	0	45	173	77	25.7276	0	1	64	37	31.6	1.07	6.57	0	10	5	1	100	0	1	2	1	38	70	175	22.8571	18.6	32	13	1
2019-10-22	29	1	0	67	168	95	33.6593	0	0	68	38.8	19	1.15	1.3	0	8	7	1	0	0	0	2	1	47	80	170	27.6817	7.8	46	43	1
2019-03-20	30	1	0	56	167	61	21.8724	0	0	81	41.9	24.4	1.32	18.26	0	11	8	1	0	0	1	1	1	45	60	170	20.7612	23.3	124	84	1
2015-06-29	31	1	0	49	165	70.5	25.8953	1	0	86	34.5	201.6	8.2	180.55	0	39	8	1	0	0	1	2	1	28	55	167	19.721	42	123	53	1
2019-11-28	32	1	0	37	168	100	35.4308	0	1	62	32.8	27.4	1.18	11.73	0	10	6	1	0	0	1	3	1	43	62.5	165	22.9568	28.9	19	14	1
2019-04-30	33	1	0	43	171	80	27.3588	0	0	81	50	9.8	0.92	28.73	0	6	7	1	0	0	0	1	1	36	55	165	20.202	13.2	136	78	1
2019-04-24	34	1	0	53	175	70	22.8571	0	0	92	33.2	65.8	1.21	20.74	0	14	10	1	0	0	0	1	1	44	65	170	22.4913	16.6	204.3	54	1
2015-02-02	35	1	0	51	181	60	18.3145	0	0	873	40.7	824.7	2.08	2396.41	1	40	7	1	0	0	0	2	1	35	90	175	29.3878	8.1	379	10.8	1
2019-11-22	36	1	0	51	168	60	21.2585	0	0	41	34.2	11.1	1.16	2716.28	1	8	7	1	0	0	1	3	1	53	65	165	23.8751	15.7	28	20	1
2019-09-24	37	1	0	43	174	78	25.763	0	0	68	41.8	64	1.18	4111.32	1	13	7	1	0	0	1	1	1	44	60	168	21.2585	20.2	31	15	1
2019-10-17	39	1	0	41	172	70	23.6614	0	0	63	36.7	18	1.07	90.36	0	7	5	1	0	0	1	2	1	27	65	170	22.4913	13.8	60	22	1
2017-04-29	40	1	0	45	170	82	28.3737	0	0	80	45.8	18.2	0.97	209.8	0	7	5	1	76000	1	0	2	1	51	60	165	22.0386	16	30	42	1
2018-07-18	41	1	0	34	173	70	23.3887	1	1	66	33.1	8.2	0.98	320911	1	6	6	1	3590000	1	1	3	1	50	60	170	20.7612	23.7	72	80	1
2017-12-22	42	1	0	50	167	78	27.968	0	0	55	31.1	56.3	1.27	19.25	0	14	10	1	25000	1	0	3	1	42	70	168	24.8016	8.9	24	21	1
2018-09-22	43	1	0	39	170	68	23.5294	1	0	56	36	37.6	1.17	1207.16	1	11	6	1	100	0	1	1	1	35	75	170	25.9516	12.9	87	51	1
2017-11-08	44	1	0	46	178	84	26.5118	0	0	58	39.6	14.2	1.05	1160	1	7	5	1	499	1	1	1	0	24	60	162	22.8624	12	69	53	1
2015-03-27	45	1	0	32	170	68	23.5294	0	0	568	42.2	436	2.05	99.45	0	40	9	1	0	0	0	1	1	27	65	170	22.4913	48.2	199	153	1
2015-10-14	46	1	0	53	167	57	20.4382	0	0	137	38.3	409.7	1.56	91778	1	28	9	1	0	0	1	2	1	31	65	167	23.3067	23.8	1784	643	1
2017-12-11	47	1	0	42	174	72	23.7812	1	0	64	44.9	14.1	0.96	450.46	1	6	7	1	100	0	0	2	1	45	80	170	27.6817	37.4	101	69	1
2020-03-29	48	1	0	31	170	65	22.4913	1	0	93	41.5	16.6	1.05	3.47	0	7	5	1	0	0	1	2	1	50	65	172	21.9713	8.4	50	49	1
2017-05-03	49	1	0	49	170	68	23.5294	0	0	108	41.2	553.3	1.22	4200.28	1	24	10	1	788	1	0	3	1	39	55	170	19.0311	21.6	47	32	1
2018-02-06	50	1	0	38	165	75	27.5482	0	0	83	35	10.8	1.09	5936.77	1	7	6	1	196000	1	1	1	1	35	60	168	21.2585	25.6	59	71	1
2020-04-11	51	1	0	62	170	65	22.4913	1	0	64	37.8	10.7	1.03	1.58	0	7	5	1	0	0	1	1	1	53	60	170	20.7612	19.7	36	32	1
2015-01-30	52	0	0	57	165	100	36.7309	0	0	69	40.1	33.6	1.38	12.47	0	13	9	1	0	0	0	1	1	42	60	168	21.2585	103.8	30	80	0
2015-06-17	55	0	0	46	170	75	25.9516	0	0	55	28.9	70.6	1.32	8.09	0	15	11	1	0	0	1	2	1	41	69	173	23.0546	63.6	149	106	0
2015-12-24	56	0	0	49	164	57	21.1927	0	0	53	34	21.1	1.41	10.09	0	11	7	1	0	0	0	2	1	26	62	170	21.4533	17.1	70	33	0
2015-12-04	57	0	0	48	169	74.5	26.0845	0	1	73	33.9	56.5	1.36	2.38	0	14	8	1	100	0	1	1	1	45	67	172	22.6474	80.4	276	93	0
2015-04-16	58	0	0	50	170	64	22.1453	1	0	186	39.8	86.6	3.42	39.79	0	33	10	1	0	0	1	1	1	45	75	175	24.4898	13.4	130	47	0
2015-11-03	59	0	0	54	160	61	23.8281	0	0	59	34	16.5	1.2	15.16	0	8	9	1	0	0	0	2	1	16	50	170	17.301	16.2	74	21	0
2015-12-26	60	0	0	52	160	62	24.2187	1	0	69	43.6	89.3	1.08	3.44	0	14	9	1	0	0	1	1	1	21	65	170	22.4913	11.4	102	67	0
2015-08-26	61	0	0	61	168	77	27.2817	0	1	76	41.4	30.6	3.12	11.15	0	21	8	1	0	0	1	2	1	33	65	175	21.2245	47.4	123	44	0
2016-04-28	62	0	0	63	169	62	21.7079	0	1	70	29.8	41.2	1.47	623.78	1	14	8	1	0	0	0	2	1	9	32	124	20.8117	11.3	36	22	0
2016-05-19	63	0	0	64	170	60	20.7612	0	0	82	34.9	31.3	1.14	15.17	0	10	6	1	0	0	1	1	0	36	50	155	20.8117	14.5	69	27	0
2016-02-25	64	0	0	45	170	80	27.6817	0	1	68	26.3	27.9	1.34	185.55	0	12	7	1	92200	1	0	2	1	18	55	165	20.202	14.6	48	35	0
2016-05-10	65	0	0	59	168	68	24.093	0	0	72	361	12.9	0.98	5.31	0	6	7	1	0	0	1	1	1	39	80	170	27.6817	13.8	95	66	0
2016-05-04	66	0	0	62	163	57.5	21.6418	0	1	79	43	16.9	1.09	304.4	0	7	5	1	0	0	1	2	1	8	28	120	19.4444	47	153	42	0
2016-05-01	67	0	0	36	169	69	24.1588	0	1	74	40	12.1	1.16	18997.4	1	8	8	1	0	0	1	1	0	39	61	162	23.2434	12	50	86	0
2016-05-19	68	0	0	26	167	67	24.0238	0	0	67	37.8	19.4	1.79	68	0	13	9	1	0	0	1	2	1	26	60	175	19.5918	47	153	42	0
2016-07-03	69	0	0	64	170	59	20.4152	0	0	118	28.9	34.5	1.77	108.5	0	18	11	1	0	0	0	2	0	9	22	128	13.4277	5.9	74	80	0
2016-06-17	70	0	0	61	166	73	26.4915	0	0	74	38.6	28.6	0.97	107.3	0	8	5	1	0	0	1	1	1	50	50	168	17.7154	84.7	30	53	0
2016-03-10	71	0	0	59	172	80	27.0416	0	0	86	31.9	26.9	1.19	119.06	0	10	7	1	24600	1	1	2	1	32	55	168	19.487	16	30	20	0
2017-05-27	72	0	0	58	171	61	20.8611	1	0	71	34.9	11.8	1.08	6533.92	1	7	6	1	376	1	1	1	1	23	55	165	20.202	18	585	280	0
2016-10-14	73	0	1	61	156	57	23.4221	0	0	63	29.6	33.2	1.15	2.66	0	11	7	1	0	0	1	1	1	51	65	175	21.2245	11.1	162	79	0
2016-10-09	75	0	0	54	178	69	21.7776	1	1	62	33.3	18.6	1.1	1.25	0	8	7	1	100	0	1	3	0	31	45	156	18.4911	241.2	434	192	0
2015-02-22	77	0	0	63	168	73	25.8645	0	0	81	35.3	21.1	1.16	3.23	0	9	7	1	0	0	1	1	1	20	50	170	17.301	52.4	79	46	0
2015-06-22	78	0	0	49	176	67	21.6296	0	0	187	42.6	16.8	11.5	2.66	0	40	7	1	0	0	0	2	1	53	67	172	22.6474	21.1	82	55	0
2017-02-16	79	0	0	54	178	76	23.9869	0	0	84	40	53.1	1.33	16.56	0	14	7	1	0	0	1	2	0	34	55	158	22.0317	22.8	107	74	0
2016-08-26	80	0	0	54	165	55	20.202	1	0	61	34.3	19.4	1.02	7.15	0	7	6	1	0	0	0	2	1	19	50	168	17.7154	17.4	81	60	0
2016-10-31	81	0	0	44	170	60	20.7612	0	0	60	36.7	9.6	1.04	1.91	0	7	5	1	100	0	1	3	1	31	60	160	23.4375	25.4	30	42	0
2016-10-27	82	0	0	33	163	63.5	23.9	0	1	74	35.2	5.8	0.96	13.5	0	6	5	1	25400	1	1	2	0	52	55	160	21.4844	67	23	16	0
2016-10-16	83	0	0	45	170	70	24.2215	1	0	67	37	17.7	1.18	39.02	0	8	5	1	198	1	1	2	1	28	55	168	19.487	80	35	28	0
2017-01-02	84	0	0	68	167	65	23.3067	0	0	68	33.2	6.6	1.06	2.46	0	7	6	1	6640	1	1	2	1	65	55	162	20.9572	21.2	43	38	0
2016-05-26	85	0	0	60	173	70	23.3887	0	1	58	39	46	1.18	23.7	0	12	9	1	0	0	1	1	1	40	68	170	23.5294	18.3	35	24	0
2016-10-17	86	0	0	48	166	55	19.9594	0	0	61	32.7	37.4	1.23	29.6	0	12	8	1	0	0	1	3	1	35	60	170	20.7612	24.7	95	74	0
2016-02-02	87	0	0	47	170	65	22.4913	1	1	83	45	40.4	1.08	4.86	0	11	6	1	0	0	1	1	1	43	90	170	31.1419	11.5	138	88	0
2017-03-29	88	0	1	36	163	70	26.3465	0	1	60	37.5	10	0.99	70743.9	1	6	5	1	100	0	0	2	1	14	51	140	26.0204	8.1	25	8	0
2016-12-28	89	0	1	63	160	75	29.2969	0	0	34	39.7	363.5	1.48	8218.11	1	22	7	1	100	0	0	2	0	52	62	160	24.2187	32.2	110	176	0
2017-05-10	90	0	0	59	165	52	19.1001	1	1	106	36	37	1.24	6.6	0	13	7	1	100	0	1	1	0	41	55	156	22.6003	80.2	170	87	0
2016-11-16	91	0	0	54	163	64	24.0882	0	0	68	73	30.1	1.23	34.97	0	11	6	1	448	1	1	3	1	49	75	172	25.3515	73.4	460	176	0
2016-12-14	92	0	0	61	185	55	16.0701	1	0	70	27.4	20.6	1.4	3.81	0	11	7	1	100	0	0	1	1	50	50	165	18.3655	6.3	6	3	0
2016-09-22	93	0	0	60	169	63	22.0581	0	0	62	34.3	53.3	1.29	16.26	0	14	8	1	174	1	0	2	1	36	70	175	22.8571	8.2	158	64	0
2017-05-04	94	0	0	62	172	65	21.9713	0	0	82	35.8	40.9	1.14	11.53	0	11	6	1	64.9	0	1	1	1	47	70	170	24.2215	27.8	94	132	0
2017-07-02	95	0	1	47	162	51	19.433	1	1	71	48	15.6	0.99	26.44	0	6	5	1	100	0	1	2	0	35	55	160	21.4844	24.1	26	65	0
2015-12-23	96	0	0	52	174	68	22.46	1	1	78	45	23.2	0.97	3.25	0	8	5	1	0	0	1	2	0	45	58	160	22.6562	17.2	102	109	0
2017-01-31	97	0	0	41	170	68	23.5294	0	1	82	31.7	11.9	1.06	14.01	0	7	6	1	85	0	1	2	0	16	50	160	19.5312	12.1	42	81	0
2017-01-24	98	0	0	69	165	59	21.6713	0	1	87	41	6.3	0.98	2.61	0	6	6	1	100	0	1	2	1	41	65	172	21.9713	13.8	75	39	0
2018-03-18	99	0	0	66	160	65	25.3906	1	1	94	41.5	12.2	1.04	121.97	0	7	5	1	100	0	1	2	0	34	70	160	27.3437	18.6	20	30	0
2016-09-08	100	0	0	53	167	65	23.3067	0	0	63	36.6	44.2	1.33	6.24	0	13	7	1	-3	0	1	3	1	12	35	140	17.8571	26.8	77	39	0
2017-03-16	101	0	0	40	169	63.5	22.2331	0	0	64	35.5	24.2	1.31	5738.86	1	11	5	1	1450	1	1	2	1	37	60	168	21.2585	14.7	25	22	0
2015-04-17	102	0	0	39	166	65	23.5883	0	1	108	35	127.6	3.06	7128.39	1	28	10	1	0	0	1	1	1	42	75	170	25.9516	14.4	88	77	0
2017-09-21	103	0	0	46	168	63	22.3214	1	0	74	36.1	46.6	1.55	4.68	0	15	7	1	100	0	0	1	1	37	65	170	22.4913	7.6	142.2	149.1	0
2015-07-02	104	0	1	54	155	48	19.9792	0	1	50	43.3	102.6	13.2	456.04	1	40	7	1	0	0	0	1	1	16	45	155	18.7305	40.1	1132	1568	0
2015-07-04	105	0	0	64	158	76	30.4438	0	0	53	26.1	81	2.68	82.03	0	23	12	1	0	0	1	2	1	35	85	175	27.7551	22.6	114	27	0
2017-04-14	106	0	0	43	175	50	16.3265	0	0	123	36	400	3.4	13.94	0	35	10	1	0	0	0	1	1	18	50	170	17.301	23.9	132	64	0
2017-05-10	107	0	0	30	162	70	26.6728	0	0	82	43	18	1.14	10415.3	1	8	5	1	9690	1	1	3	1	50	65	168	23.03	56.7	98	65	0
2017-09-02	108	0	0	59	160	48	18.75	0	0	77	35.9	23.3	1.19	6.15	0	10	6	1	100	0	0	2	1	66	60	155	24.974	18.7	27	15	0
2017-09-01	109	0	0	41	172	74	25.0135	1	1	95	22	24.3	1.3	2.73	0	11	9	1	100	0	1	2	0	37	60	160	23.4375	15.7	56	33	0
2018-02-01	110	0	1	49	165	55	20.202	0	1	49	34.9	12.7	1.02	7.4	0	7	6	1	100	0	0	2	1	10	30	150	13.3333	45.3	65	63.6	0
2017-11-18	111	0	0	44	171	64	21.8871	1	1	89	49	15.9	0.84	31.36	0	6	5	1	100	0	1	2	1	22	60	170	20.7612	2.1	4	26	0
2015-07-28	113	0	0	40	172	65	21.9713	0	0	162	44.9	147.4	2.16	949.4	1	29	10	1	0	0	1	2	1	33	55	170	19.0311	66.9	116	40	0
2016-08-10	114	0	0	36	170	55	19.0311	1	0	49	30.6	583.7	1.24	58556.1	1	22	8	1	0	0	1	3	1	32	60	172	20.2812	18.3	102	192	0
2017-07-18	115	0	0	42	170	70	24.2215	0	0	70	42.5	13.6	1.01	1.09	0	7	5	1	0	0	1	1	0	45	35	153	14.9515	10.8	29	15	0
2017-07-13	116	0	0	56	165	60	22.0386	0	0	63	29.8	28.4	1.27	117.24	0	11	7	1	0	0	0	2	1	40	70	170	24.2215	13.6	662	507	0
2017-08-11	117	0	0	56	172	70	23.6614	0	0	58	38	29.7	1.18	3.28	0	10	5	1	100	0	1	2	1	33	65	172	21.9713	9.6	204	85	0
2017-10-24	118	0	0	46	170	77.5	26.8166	0	1	69	32.4	26.9	1.14	55.14	0	10	8	1	100	0	0	2	1	41	70	173	23.3887	25	67	33	0
2017-12-28	119	0	0	41	155	55	22.8928	1	0	80	44.2	13.9	1.01	4.24	0	7	7	1	100	0	1	1	1	33	55	165	20.202	19.4	34	31	0
2018-01-03	120	0	0	47	174	66	21.7994	0	0	92	34.6	22.4	1.11	8.27	0	9	10	1	3330000	1	1	2	1	62	65	160	25.3906	62.6	54	43	0
2018-01-27	121	0	0	51	170	74	25.6055	1	0	80	37.8	10.5	1.05	4.78	0	7	6	1	100	0	0	2	1	45	65	170	22.4913	17.3	91	32	0
2017-03-29	122	0	1	57	158	50	20.0288	1	0	63	42	10.5	0.93	4.66	0	6	5	1	100	0	1	2	1	29	57	162	21.7193	12.5	34	13	0
2017-10-18	123	0	0	64	168	75	26.5731	1	0	59	33	133.5	1.34	3.36	0	17	9	1	100	0	0	1	1	58	57	167	20.4382	14.8	422	318.5	0
2016-07-21	124	0	1	59	160	66	25.7812	0	1	60	39.5	18.2	0.92	4.26	0	7	5	1	5280	1	1	2	1	50	60	165	22.0386	31.4	86	64	0
2016-01-27	126	0	0	63	168	52	18.424	0	0	74	34.2	37.3	1.37	2.37	0	13	8	1	0	0	1	1	0	7	32	120	22.2222	16.2	498	291	0
2017-09-12	127	0	0	27	172	60	20.2812	0	0	59	24	78	1.54	49.82	0	17	10	1	100	0	1	1	1	50	65	167	23.3067	39.5	94	36	0
2018-01-28	128	0	1	28	161	51.5	19.8681	0	0	57	42.2	13.2	0.95	1112	1	6	7	1	0	0	1	2	1	21	60	170	20.7612	27	63	22	0
2017-08-29	129	0	0	36	178	68	21.4619	0	0	48	42.1	39.3	1.28	15.96	0	12	8	1	57.7	0	1	1	0	18	65	160	25.3906	12.8	52	41	0
2018-01-30	130	0	0	52	169	61	21.3578	1	0	52	33.7	43.3	1.35	9.46	0	13	8	1	100	0	0	2	1	45	75	170	25.9516	3.4	24	38	0
2018-02-08	131	0	1	62	173	74	24.7252	0	0	44	39.5	299.3	2.34	41.3	0	27	10	1	100	0	1	2	0	22	70	170	24.2215	11.4	44	17	0
2018-02-09	132	0	0	67	162	54	20.5761	0	0	98	38.7	39.7	1.38	2809.92	1	14	9	1	118000	1	1	1	1	53	70	170	24.2215	6.7	21	23	0
2017-03-30	133	0	0	66	172	53	17.9151	0	0	108	47.1	42.5	1.48	36.02	0	16	9	1	100	0	1	1	1	44	65	173	21.7181	20.6	23	16	0
2018-04-05	135	0	0	37	170	61	21.1073	1	0	60	36	48	1.32	2.67	0	13	7	1	100	0	1	2	0	8	26	130	15.3846	15.2	34.9	248	0
2015-09-06	136	0	1	31	166	53	19.2336	0	1	151	36.6	162.1	3.05	7488.3	1	33	9	1	0	0	1	2	1	55	60	168	21.2585	48.5	172	7	0
2015-10-20	137	0	1	52	155	52	21.6441	0	0	27	34.7	47	1.5	644.4	1	15	10	1	0	0	1	1	1	30	80	170	27.6817	23.8	87	120	0
2018-05-02	138	0	0	50	175	75	24.4898	0	1	86	32.2	28.1	1.15	43.44	0	10	7	1	422000	1	1	2	1	46	70	165	25.7117	6	106	81.4	0
2018-04-15	139	0	0	62	174	70	23.1206	0	0	78	37.3	16.4	1.18	22.95	0	8	5	1	3230000	1	1	2	1	50	75	160	29.2969	15.9	30	15	0
2018-05-15	140	0	0	46	167	61	21.8724	1	0	83	41.4	12.9	0.98	449.64	1	6	5	1	100	0	1	2	0	29	65	156	26.7094	9.6	44	79	0
2015-07-20	141	0	0	68	168	72.2	25.5811	0	0	146	38	330	2.73	6.12	0	34	10	1	0	0	0	1	1	15	55	162	20.9572	39.1	46	28	0
2018-05-30	142	0	0	48	180	97	29.9383	0	0	75	41.7	22.9	1.05	2.85	0	8	5	1	100	0	1	2	1	41	60	165	22.0386	144	33	20	0
2018-05-26	143	0	0	47	170	68	23.5294	1	0	78	37.6	17.7	1.19	96.53	0	9	5	1	100	0	1	3	1	14	60	170	20.7612	15.2	143	66.2	0
2018-01-16	144	0	0	69	165	63	23.1405	0	0	66	32.5	32.7	1.06	31.52	0	10	6	1	828000	1	1	2	0	59	65	160	25.3906	32.4	18.1	58.1	0
2017-12-16	145	0	0	35	170	70	24.2215	0	0	69	37.5	35.2	1.12	20934.6	1	10	5	1	297	1	1	3	1	26	60	170	20.7612	72	840	66	0
2018-05-27	146	0	0	36	170	71	24.5675	0	1	90	44.2	16.9	1.32	5.5	0	10	7	1	5940	1	1	2	0	54	56	156	23.0112	37.1	98	23.5	0
2018-04-24	147	0	0	40	166	71.5	25.9472	0	1	96	42	12.4	0.97	592.61	1	7	5	1	100	0	0	1	1	60	60	170	20.7612	28.6	22	19	0
2018-06-08	148	0	0	48	162	75	28.578	0	1	73	34.9	44.1	1.12	26.13	0	11	8	1	4400000	1	1	2	0	23	50	162	19.052	9.7	481	421	0
2018-08-28	149	0	1	62	150	54	24	0	1	79	37.7	70.2	1.85	2180.16	1	19	9	1	3530	1	1	2	1	38	55	168	19.487	20.5	145	93	0
2017-12-08	150	0	0	47	178	80	25.2493	0	1	157	37	19.9	1.21	75.12	0	22	6	1	100	0	1	2	0	41	60	160	23.4375	44.3	46	42	0
2016-04-26	151	0	0	41	170	68	23.5294	0	0	250	33	300	2.6	44000	1	38	10	1	0	0	1	2	1	44	55	170	19.0311	9.5	54	31	0
2018-05-15	152	0	0	69	170	65	22.4913	1	0	66	42	35.4	1.09	83.33	0	10	6	1	100	0	1	2	0	30	45	155	18.7305	2.5	48	52	0
2017-06-22	153	0	0	61	160	66	25.7812	0	0	75	41.1	44	1.14	132.35	0	11	7	1	100	0	1	1	1	39	69	170	23.8754	6.4	15	10	0
2015-03-13	154	0	0	61	174	60	19.8177	0	0	165	33.8	237	2.1	3.07	0	31	10	1	0	0	1	2	1	48	55	160	21.4844	7.2	51	21	0
2015-12-06	155	0	0	40	170	65	22.4913	0	1	67	43	137.7	0.97	3768.91	1	14	7	1	2770	1	0	2	1	43	68	168	24.093	12.5	128	104	0
2018-08-26	156	0	0	29	181	65	19.8407	0	0	79	53.5	15.4	0.87	4.48	0	6	5	1	939	1	1	1	1	42	70	170	24.2215	30.3	50	23	0
2018-07-23	157	0	0	62	171	64.5	22.0581	0	0	46	36.5	30.3	1.07	201.48	0	9	5	1	100	0	1	2	0	46	55	160	21.4844	5.1	92	234	0
2016-03-25	158	0	0	31	171	76	25.9909	0	1	70	34.3	27.3	1.08	580.29	1	22	10	1	0	0	1	2	0	43	50	156	20.5457	16.3	91	63	0
2018-08-31	159	0	0	60	162	62	23.6244	0	0	117	41.6	114.5	1.55	501.3	1	21	10	1	0	0	1	2	1	50	70	160	27.3437	23.1	56.2	38.4	0
2018-07-08	160	0	0	56	170	51	17.6471	0	1	76	26.2	40	1.26	8.1	0	12	8	1	100	0	1	3	1	21	70	175	22.8571	20.9	80	163	0
2019-06-22	161	0	0	48	176	98	31.6374	1	0	57	34.2	26	1.01	9.64	0	8	7	1	0	0	1	1	0	48	60	160	23.4375	10	61	65	0
2018-09-05	162	0	0	58	175	55	17.9592	0	1	82	33.1	16.1	1.03	41.77	0	7	6	1	76400	1	0	1	1	49	70	170	24.2215	30.8	57	11	0
2018-08-01	163	0	0	32	170	70	24.2215	1	1	81	43.7	24.3	1.01	237.38	0	8	5	1	100	0	0	2	1	30	60	170	20.7612	39.9	28	18	0
2018-09-19	164	0	0	50	162	84	32.0073	0	0	95	28.4	17.1	1.15	2.43	0	9	6	1	100	0	1	2	1	59	70	165	25.7117	12.6	44	47	0
2019-06-14	165	0	0	46	176	60	19.3698	0	0	59	39.2	19.3	1.25	2505	1	9	8	1	0	0	1	1	1	63	70	170	24.2215	10	46	61	0
2018-08-19	166	0	0	40	166	60	21.7738	0	0	62	29.2	14.7	1.18	20.3	0	22	11	1	286	1	0	1	0	42	50	155	20.8117	31.4	33	57	0
2018-07-18	167	0	0	50	160	65	25.3906	0	0	66	34.9	35.7	1.3	7.11	0	25	7	1	100	0	1	2	1	5	22	112	17.5383	5.8	75	26	0
2017-11-22	168	0	0	59	168	79	27.9904	1	0	55	47	11.8	1.02	1388.32	1	7	5	1	29800	1	1	2	1	50	60	165	22.0386	12.5	42	40	0
2018-01-21	169	0	0	55	170	68	23.5294	1	0	93	36.9	49.4	1.28	52.76	0	14	7	1	100	0	1	1	0	12	40	140	20.4082	13.7	712	758	0
2019-07-13	170	0	0	60	176	82	26.4721	0	0	74	35.1	53.3	1.44	9.74	0	15	7	1	0	0	1	1	1	42	70	173	23.3887	15.4	20.8	19.6	0
2017-06-06	171	0	0	60	170	68	23.5294	0	0	51	32.5	22.9	0.98	1.95	0	8	6	1	100	0	1	1	0	50	70	165	25.7117	38.7	34	28	0
2018-10-25	172	0	0	56	162	60	22.8624	0	0	68	24.4	58.9	1.33	113	0	14	11	1	59000	1	1	1	1	23	60	170	20.7612	8	284	124	0
2015-03-10	173	0	0	59	179	81	25.2801	0	0	804	44	428	3.79	1.22	0	40	8	1	0	0	1	1	1	52	60	158	24.0346	5.9	22	92	0
2016-01-18	174	0	0	31	172	70	23.6614	0	1	70	35.9	10.9	1.22	1117.47	1	9	10	1	0	0	0	1	1	29	69	176	22.2753	42.9	94	67	0
2018-10-03	175	0	0	39	168	57	20.1956	0	0	60	43.5	45.3	2.18	2.12	0	19	11	1	100	0	1	1	0	41	50	160	19.5312	9.2	32.2	24	0
2017-03-14	176	0	0	66	175	76	24.8163	0	0	54	30.8	48.2	1.45	19701	1	15	8	1	100	0	1	2	1	34	60	168	21.2585	14.3	172	527	0
2018-11-05	177	0	0	52	166	89	32.2979	0	0	186	27.3	426.4	1.43	16.18	0	30	11	1	0	0	1	1	1	17	50	170	17.301	29	519	154	0
2018-12-28	178	0	0	52	170	70	24.2215	0	0	71	30.7	45.8	1.47	51.05	0	14	10	1	0	0	1	1	1	24	59	170	20.4152	28.9	38	56	0
2019-08-25	179	0	0	51	168	69	24.4473	0	0	86	33.6	17.7	1.11	137.12	0	8	6	1	0	0	1	2	1	8	21	127	13.02	11.2	37	9	0
2018-10-31	180	0	0	53	165	60	22.0386	0	1	75	38.3	12.6	1.18	265.45	0	8	5	1	155	1	1	1	0	17	45	158	18.026	1.6	47	43	0
2018-10-14	181	0	0	51	167	103	36.9321	0	0	71	37.6	32.8	1.12	8.83	0	10	5	1	100	0	1	1	1	50	65	170	22.4913	29	15	14	0
2018-09-28	182	0	1	58	158	62	24.8358	0	0	126	24.1	21.3	1.08	22.57	0	12	8	1	100	0	1	1	1	45	70	170	24.2215	68.6	89	55	0
2018-11-25	183	0	0	63	162	54	20.5761	0	0	69	32.6	12.9	1.21	501.22	1	9	11	1	0	0	1	2	1	20	65	175	21.2245	8.9	94.4	36.9	0
2018-11-22	184	0	0	63	168	53.5	18.9555	0	1	69	34.6	54.2	1.45	12.85	0	15	11	1	0	0	1	1	1	33	85	173	28.4005	9.8	47	37	0
2018-10-31	185	0	0	48	170	66.5	23.0104	0	0	57	32.6	20.1	1.71	28.13	0	13	6	1	157	1	1	1	1	46	70	172	23.6614	6.5	47	46	0
2018-10-12	186	0	0	63	168	70	24.8016	1	1	104	36.2	20.2	1.05	1.39	0	9	5	1	0	0	1	1	1	48	70	168	24.8016	3.9	550	97	0
2019-09-11	187	0	0	62	175	75	24.4898	0	1	59	41.8	23.6	0.92	1431.08	1	8	7	1	0	0	1	2	0	64	52	155	21.6441	5.9	51	15	0
2019-02-02	188	0	0	37	171	56	19.1512	0	0	69	44	20.8	0.96	6851.8	1	7	7	1	0	0	1	2	0	12	47	158	18.8271	38.4	74	207	0
2017-02-12	189	0	0	21	164	55	20.4491	0	0	70	49	41.2	0.99	2000000	1	10	6	1	100	0	0	3	1	26	63	170	21.7993	15.1	37	26	0
2018-11-23	190	0	0	40	163	57.5	21.6418	0	0	69	44.2	29.3	1.18	3.22	0	10	7	1	0	0	1	1	0	29	60	158	24.0346	14.3	102	45	0
2015-02-20	191	0	0	48	167	68	24.3824	0	0	88	41.7	70.4	1.12	9.42	0	13	9	1	0	0	1	1	1	57	60	170	20.7612	9	38	43	0
2019-09-23	192	0	0	50	178	72	22.7244	0	0	74	31.9	23.7	1.28	45.04	0	10	8	1	0	0	1	1	1	40	70	170	24.2215	8.7	50.5	30.8	0
2018-02-22	193	0	0	33	177	70	22.3435	1	0	101	46	12.9	1.09	2.93	0	9	5	1	100	0	1	2	1	57	65	170	22.4913	45.5	58	25	0
2018-10-24	194	0	0	43	160	55	21.4844	0	0	54	45.1	471.3	2.06	3226	1	27	9	1	0	0	1	1	1	44	68	168	24.093	19.8	72	48	0
2019-09-28	195	0	1	47	154	56	23.6128	0	0	49	34	52.7	1.74	27.82	0	17	11	1	0	0	1	1	1	8	30	120	20.8333	14.5	67	44	0
2019-02-06	196	0	0	45	168	74	26.2188	0	0	162	43	462.2	2.14	199.13	0	33	9	1	0	0	1	2	1	35	70	162	26.6728	41.7	45	90	0
2019-09-30	197	0	0	56	165	60	22.0386	0	1	69	35	39.5	1.37	1.91	0	13	10	1	0	0	1	1	1	18	65	170	22.4913	17.6	99	71	0
2015-07-21	198	0	0	60	174	74	24.4418	0	0	168	32.9	146.3	3.38	1875.12	1	34	11	1	0	0	1	2	1	41	90	175	29.3878	47.2	180	160	0
2016-03-14	199	0	0	48	171	97	33.1726	0	0	49	27.6	109	1.79	4.77	0	20	12	1	435	1	0	2	1	32	65	175	21.2245	5.4	204	68	0
2018-12-25	200	0	0	51	167	70	25.0995	0	0	159	32.8	376.4	1.71	22.3	0	30	10	1	0	0	1	2	1	35	68	175	22.2041	19.4	105	34	0
2015-12-23	201	0	0	42	178	81.5	25.7228	0	1	87	39.1	22.2	1.02	17.8	0	8	7	1	0	0	1	2	1	27	60	170	20.7612	13.3	62	58	0
2018-08-30	202	0	0	50	167	67	24.0238	0	1	72	38.2	10.6	1.04	179.88	0	7	9	1	84700	1	1	2	1	34	65	168	23.03	17.9	98	120	0
2018-08-28	203	0	0	43	168	84	29.7619	0	0	64	38.7	20.4	1.05	9.34	0	8	5	1	100	0	1	1	1	48	70	175	22.8571	28.6	131	80	0
2019-10-26	204	0	0	65	178	78	24.6181	0	1	73	32.4	104.4	1.63	168.11	0	19	10	1	0	0	1	2	1	38	65	170	22.4913	8.1	46	17	0
2017-11-28	205	0	0	42	170	68	23.5294	0	0	72	37.1	14.8	0.99	1573.16	1	6	5	1	5780	1	0	2	1	49	75	168	26.5731	10.5	34.7	49.3	0
2019-03-14	206	0	0	47	178	75	23.6713	0	0	136	30.4	266.4	2.17	6.38	0	30	13	1	0	0	1	1	0	44	50	156	20.5457	28.5	85	68	0
2019-03-01	207	0	0	65	178	84	26.5118	0	0	93	41.9	24.3	1.13	3.24	0	10	9	1	0	0	1	1	1	50	65	170	22.4913	13	34	20	0
2019-03-30	208	0	1	58	162	62	23.6244	0	0	368	42.4	460	2.62	19.57	0	40	10	1	0	0	0	1	0	26	35	140	17.8571	27.6	27.1	16.8	0
2019-02-25	209	0	0	40	174	84	27.7447	0	1	47	40	25.5	0.88	2.15	0	8	7	1	0	0	1	1	1	41	58	160	22.6562	11.3	12	15	0
2019-03-31	210	0	0	72	159	59	23.3377	0	0	48.6	45.8	53.8	1.66	2.3	0	16	13	1	0	0	1	1	0	40	60	155	24.974	30.2	424	413	0
2017-07-12	211	0	0	45	165	55.5	20.3857	0	0	47	46.3	8.3	1.04	1.86	0	7	5	1	100	0	0	2	1	53	60	174	19.8177	7	11	21	0
2019-11-07	212	0	0	59	167	45	16.1354	0	0	96	46.9	69	1.12	14.97	0	14	9	1	0	0	1	2	0	64	60	155	24.974	12.7	21	31	0
2019-11-07	213	0	0	49	170	71	24.5675	0	0	78	44.6	71.3	1.53	110.17	0	17	8	1	0	0	1	3	1	40	85	170	29.4118	54	33	81	0
2019-04-10	214	0	0	52	167	65	23.3067	0	0	232	36.6	366	2.17	6.84	0	36	10	1	0	0	1	1	1	60	67.5	165	24.7934	12	61.3	10.1	0
2019-11-10	215	0	0	62	172	66	22.3094	0	0	84	35	14.6	1.04	3.11	0	7	6	1	0	0	1	2	1	36	75	170	25.9516	10.2	153	44	0
2016-11-03	216	0	0	66	152	50	21.6413	0	0	151	37.6	412.2	1.48	28649.2	1	28	9	1	0	0	0	1	0	16	40	150	17.7778	9.52	17	60	0
2019-11-11	217	0	0	50	158	46	18.4265	0	0	182	35.3	16.2	0.94	2977.96	1	13	6	1	0	0	1	3	0	6	24	105	21.7687	11.1	60	77	0
2017-06-12	218	0	1	48	157	64	25.9645	0	0	40	45.8	36.5	1.05	258487	1	10	7	1	414	1	0	2	1	46	75	175	24.4898	92.8	730	435	0
2016-01-22	219	0	0	40	170	64.5	22.3183	1	1	65	39	136.4	1.32	12713.1	1	17	7	1	0	0	0	1	1	45	65	160	25.3906	9.4	43	24	0
2019-04-13	220	0	0	56	169	71	24.8591	0	0	107	41.2	46.7	1.24	12.97	0	14	9	1	0	0	1	2	1	19	50	155	20.8117	141.5	239	79	0
2018-12-19	221	0	0	51	170	66	22.8374	0	0	186	40.4	438	1.47	2.88	0	30	9	1	0	0	1	3	1	26	70	172	23.6614	48.1	16	32	0
2019-12-11	222	0	0	49	166	67	24.3141	0	1	69	29.2	188.6	1.62	2193.75	1	21	11	1	0	0	1	2	0	54	60	152	25.9695	61	46	24	0
2019-12-13	223	0	0	57	162	60	22.8624	0	0	62	30.8	14.4	1.25	90.11	0	9	6	1	0	0	1	2	1	49	75	175	24.4898	11.9	18	12	0
2019-12-17	224	0	0	59	165	65	23.8751	0	1	73	32.2	37.6	1.48	664.06	1	14	8	1	0	0	0	2	1	49	75	170	25.9516	10.2	98.3	162.4	0
2019-04-17	225	0	1	58	154	54	22.7694	0	0	162	31.4	382.4	2.47	3.51	0	34	10	1	0	0	1	2	0	9	25	120	17.3611	9.8	75	75.3	0
2019-12-22	226	0	0	53	164.5	62.5	23.0966	0	0	101	29.9	109	1.05	5.98	0	15	8	1	0	0	1	2	1	57	65	165	23.8751	21	45	19	0
2019-12-25	227	0	0	55	168	67	23.7387	0	1	63	31.8	38	1.58	2.83	0	15	8	1	0	0	1	1	1	48	85	180	26.2346	41.4	116	90	0
2017-02-08	228	0	0	30	161	47	18.132	0	0	78	34.3	114.2	1.42	7575.19	1	18	9	1	287000	1	0	3	1	22	70	170	24.2215	44	116	99	0
2019-05-27	229	0	0	56	171	59	20.1771	0	0	171	33.4	326.4	2.11	2.25	0	32	9	1	0	0	0	2	0	35	45	155	18.7305	25.6	107	30	0
2019-05-16	230	0	0	59	168	55	19.487	0	0	69	26.1	52	1.05	3.5	0	11	12	1	0	0	1	3	1	26	60	165	22.0386	9.8	214	67	0
2019-03-12	231	0	0	54	162	55	20.9572	0	0	73	31.1	8.6	1.24	31.27	0	9	8	1	0	0	1	1	1	59	52	160	20.3125	13.3	25.4	25.8	0
2019-12-28	232	0	0	59	165	35	12.8558	0	1	40	39	13.5	1.16	2.63	0	8	6	1	0	0	1	2	1	8	25	130	14.7929	34	229	103	0
2019-12-29	233	0	0	47	171	60	20.5191	0	1	47	35	23	1.14	2.33	0	9	6	1	0	0	1	1	0	23	50	162	19.052	15.1	170	84	0
2019-04-06	234	0	0	51	167	59	21.1553	0	0	86	37	26.3	1.2	0.85	0	10	8	1	0	0	1	1	1	47	70	168	24.8016	8.2	20	39	0
2017-05-28	235	0	0	56	158	54	21.6311	0	0	45	34	48.4	1.48	2.68	0	15	12	1	0	0	1	2	0	51	48	155	19.9792	11.6	50	24	0
2019-09-19	236	0	0	41	168	60.5	21.4357	0	0	60	33	16.8	1.11	5710.78	1	8	6	1	0	0	1	3	1	44	60	170	20.7612	27.6	24	17	0
2019-06-22	237	0	0	30	183	68	20.3052	0	0	70	38	20.8	1.07	43520	1	8	7	1	0	0	1	2	0	26	50	160	19.5312	51.2	43	20	0
2015-11-19	238	0	0	24	182	56	16.9062	0	1	65	43.9	10.4	1.18	19194	1	8	5	1	79700	1	1	2	1	45	70	172	23.6614	29.2	80	34	0
2017-11-28	239	0	0	67	170	68	23.5294	0	1	69	42.6	13.9	0.95	980.72	1	6	5	1	100	0	0	3	1	53	65	168	23.03	12.9	20	17	0
2017-05-29	240	0	0	43	168	56	19.8413	0	0	76	40.1	21.5	0.95	7.15	0	7	5	1	100	0	1	2	1	16	60	170	20.7612	61.2	49	22	0
2019-05-27	241	0	0	45	166	67	24.3141	0	0	148	43	468	2.11	1348.06	1	32	9	1	0	0	1	2	1	44	70	170	24.2215	2.9	25		0
2020-01-20	242	0	0	54	172	70	23.6614	1	1	74	35	30.8	1.24	7.78	0	11	6	1	0	0	1	1	0	47	55	155	22.8928	18.5	157	29	0
2017-05-30	243	0	0	43	175	65	21.2245	0	1	74	35.3	13.7	1.01	195.69	0	7	7	1	0	0	1	3	0	40	50	158	20.0288	3.7	75	42	0
2017-01-24	244	0	0	40	165	52	19.1001	1	1	77	36.6	16.2	1.05	2.68	0	7	5	1	100	0	1	1	1	6	20	105	18.1406	6.2	25	13	0
2017-04-07	245	0	0	63	170	64	22.1453	0	0	91	41.1	18.3	0.9	18.55	0	7	5	1	100	0	1	1	1	57	57	165	20.9366	31	108	70	0
2017-01-11	246	0	0	66	164	64	23.7954	0	0	80	36.4	48.4	1.48	4.39	0	15	6	1	100	0	0	1	1	37	55	165	20.202	7.3	80	55	0
2015-10-07	247	0	0	41	173	70	23.3887	0	0	191	40.2	134.8	2.13	379834	1	30	8	1	0	0	1	1	1	46	80	175	26.1224	36.2	65	65	0
2015-11-18	248	0	0	48	175	58	18.9388	0	0	81	28.2	71	1.2	20879.4	1	14	10	1	5880000	1	1	2	1	23	60	172	20.2812	19.2	98	102	0
2018-11-27	249	0	0	43	170	70	24.2215	0	0	182	35.8	360	1.58	753.12	1	30	10	1	0	0	1	3	1	39	80	172	27.0416	10.1	78	41	0
2018-12-04	250	0	0	67	168	62	21.9671	0	0	97	18.1	52.6	1.68	2.02	0	17	13	1	0	0	1	1	1	31	55	155	22.8928	66.9	164	147	0
2017-06-17	251	0	0	53	170	68	23.5294	1	0	91	35.9	18.2	0.99	11.51	0	7	5	1	130	1	1	1	1	17	60	170	20.7612	35.4	103	70	0
2019-06-24	252	0	0	61	165	61	22.4059	0	0	186	42	382	1.47	79667.6	1	30	10	1	0	0	1	2	1	36	75	175	24.4898	17.7	158	322	0
2019-03-27	253	0	0	63	167	57	20.4382	0	1	168	38.6	484	2.68	3.38	0	36	10	1	0	0	1	2	1	38	65	173	21.7181	12.8	62	27	0
2020-02-19	254	0	0	46	165	65	23.8751	0	1	57	38.8	31.4	1.55	152.06	0	14	5	1	0	0	1	1	1	51	50	155	20.8117	37.7	63	53	0
2016-05-28	255	0	0	51	175	80	26.1224	0	1	94	33.4	20.5	1.04	37.44	0	8	6	1	0	0	1	2	1	46	62	160	24.2187	18.8	12	14	0
2020-01-04	256	0	0	46	165	72	26.4463	0	0	105	36	30.9	1.22	467.49	1	13	6	1	0	0	1	3	0	37	51	154	21.5045	23.2	19	5	0
2019-10-02	257	0	0	37	181	81	24.7245	1	0	78	41	9.4	0.94	21.37	0	6	5	1	0	0	1	3	1	17	65	178	20.5151	17.8	25	3	0
2019-04-04	258	0	0	35	170	66	22.8374	0	0	166	39.9	468	2.28	3572.09	1	34	9	1	0	0	1	3	1	44	55	170	19.0311	22.3	23	10	0
2018-09-28	259	0	0	33	172	68	22.9854	0	0	84	43.6	12.6	1.04	117.27	0	7	5	1	1790	1	0	2	0	30	54	158	21.6311	17.3	190	140	0
2016-08-19	260	0	0	46	158	55	22.0317	0	0	100	24.09	18.2	1.33	133.74	0	11	11	1	0	0	0	1	1	7	25	124	16.2591	16.1	66	27	0
2018-02-25	261	0	0	54	170	77	26.6436	0	0	96	27.2	23.4	1.47	42.09	0	13	9	1	0	0	1	3	1	18	65	170	22.4913	15.6	569	188	0
2020-02-29	262	0	0	47	165	63	23.1405	0	1	49	35.7	95.7	2.23	1957.82	1	22	12	1	0	0	1	2	1	68	60	158	24.0346	11.8	36	26	0
2017-07-14	263	0	1	68	158	67.5	27.0389	0	0	60	30	182	1.88	1120.96	1	22	10	1	3010000	1	0	3	1	53	45	170	15.5709	28.7	30	17	0
2017-03-01	264	0	0	59	162	59	22.4813	0	0	95	37.5	24.6	1.17	2533.31	1	10	5	1	100	0	1	2	1	37	70	170	24.2215	12.4	38	66	0
2020-03-16	265	0	0	21	175	60	19.5918	0	0	57	37.9	27.3	1.2	63898.8	1	24	7	1	0	0	1	3	0	81	50	161	19.2894	12.4	35	17	0
2017-06-10	266	0	0	41	168	55	19.487	0	0	69	37.6	720	1.16	180.5	0	22	8	1	3950	1	1	3	0	45	45	165	16.5289	95	131	61	0
2020-03-27	267	0	0	59	173	66.8	22.3195	0	0	69	36.8	34	1.12	1.91	0	10	7	1	0	0	1	1	0	27	52	162	19.8141	8.5	81	210	0
2018-04-09	268	0	0	33	170	68	23.5294	0	0	74	39.5	74.6	1.19	4934.26	1	14	7	1	11300	1	1	3	1	47	65	170	22.4913	12.5	142	34.5	0
2019-08-16	269	0	0	58	170	60	20.7612	1	0	70	46	11.4	1.59	3.05	0	12	7	1	0	0	1	1	1	51	55	165	20.202	34.8	185	68	0
2015-10-25	270	0	0	52	165	62	22.7732	0	1	341	33.5	125.7	3.21	2614.33	1	40	6	1	0	0	1	1	1	11	30	140	15.3061	6.5	45	48	0
2018-11-08	271	0	0	53	172	60	20.2812	0	0	147	29.7	596.7	1.79	322736	1	31	9	1	0	0	1	1	1	58	78	168	27.6361	8.7	86	40	0
2018-12-14	272	0	0	45	178	80	25.2493	0	0	166	31.3	699	1.32	9.47	0	30	10	1	0	0	1	1	1	17	78	180	24.0741	12.1	43	43	0
2019-09-04	273	0	0	48	182	76	22.9441	1	1	110	32.5	18.6	1.29	32.79	0	12	5	1	0	0	0	1	1	23	75	168	26.5731	26.1	57	34	0
2016-11-20	274	0	0	58	168	50	17.7154	1	1	86	42.6	15.5	1.05	4154.61	1	7	5	1	100	0	1	3	1	54	65	165	23.8751	24.5	58	91	0
2018-12-24	275	0	0	47	160	55	21.4844	0	0	81	13.68	20.2	1.02	2662.05	1	7	7	1	0	0	1	2	1	37	60	165	22.0386	27.9	144	174	0
2016-11-02	276	0	0	38	169	50.5	17.6815	0	1	67	30.4	25.2	1.16	52232.3	1	10	6	1	7740	1	0	2	1	18	75	178	23.6713	11.9	73	47.1	0
2016-10-08	277	0	0	59	167	47	16.8525	0	0	60	37.9	144	1.32	39191.9	1	18	8	1	825000	1	0	3	1	40	75	173	25.0593	27.8	75	60	0
2018-01-03	278	0	0	34	180	110	33.9506	0	0	62	46.5	30.6	1.16	32070.7	1	10	5	1	325	1	1	3	1	46	65	170	22.4913	36.7	18	26	0
2020-02-05	279	0	0	28	178	54	17.0433	0	1	68	43.5	16.6	1.32	216682	1	10	5	1	0	0	1	3	1	53	60	155	24.974	15.2	24	14	0
2019-02-11	280	0	0	50	170	70	24.2215	0	0	163	38	462.2	2.21	13058.3	1	34	9	1	0	0	1	2	1	23	56	173	18.7109	73	760	42	0
2018-04-25	281	0	0	46	167	71	25.4581	1	0	78	45	12.7	1.14	790.51	1	8	8	1	0	0	1	2	0	29	65	165	23.8751	12.2	56.6	23.3	0
2016-11-20	282	0	0	7	136	26	14.0571	0	0	38	31.5	9.2	0.74	1998000	1	6	6	1	14800	1	1	3	1	36	70	175	22.8571	78.1	286	181	0
2020-01-08	283	0	0	48	172	64	21.6333	1	1	52	35.1	14.6	1.02	557.76	1	7	5	1	0	0	1	2	0	62	46	152	19.91	24.8	241.2	47	0
2019-10-09	284	0	0	47	167	82	29.4023	0	1	94	35.6	14.1	1.07	6.18	0	8	7	1	0	0	1	3	1	53	65	165	23.8751	10.9	28	4	0
2017-01-06	286	0	0	36	183	65	19.4094	1	1	63	32.6	18	1.16	8367.57	1	8	6	1	0	0	1	3	1	37	65	170	22.4913	12.5	22	34	0
2020-01-03	287	0	0	60	165	72	26.4463	0	1	64	32.8	22.2	1.31	485.04	1	10	7	1	0	0	1	2	1	18	50	160	19.5312	20.5	21	14	0
2019-10-22	288	0	0	38	172	55	18.5911	1	1	89	35.7	15.2	1.04	3.79	0	7	7	1	0	0	1	2	1	49	55	158	22.0317	17.4	20	30	0
2019-10-22	289	0	0	13	172	72	24.3375	0	0	43	37.7	43.9	0.9	724246	1	10	7	1	0	0	1	3	1	54	70	173	23.3887	31.3	86.4	23.3	0
2016-12-07	290	0	0	32	169	58	20.3074	0	0	60	36.2	37	1.21	135448	1	11	7	1	458	1	1	3	1	44	65	170	22.4913	11.6	44	28	0
2019-02-03	291	0	0	44	171	65	22.2291	0	0	162	33	566.4	2.47	13821.3	1	36	9	1	0	0	1	2	1	33	70	175	22.8571	14.7	115.4	93.1	0
2017-08-02	292	0	0	55	167	69	24.7409	0	0	97	36.1	16.1	1.35	59026.6	1	11	5	1	3630000	1	0	3	1	50	70	175	22.8571	24.97	90.5	44.9	0
2018-05-19	293	0	0	45	172	65	21.9713	0	0	150	39	586	2.5	40628.9	1	35	13	1	0	0	1	2	0	45	65	160	25.3906	19.7	193	59	0
2020-01-17	294	0	0	52	170	75	25.9516	0	1	240	39	16.4	1.12	8.73	0	21	6	1	0	0	1	2	1	38	65	172	21.9713	24.2	223	55	0
2019-03-15	295	0	1	62	158	58	23.2335	0	0	70	37.2	11.9	0.94	36737.3	1	6	8	1	0	0	0	3	1	21	75	172	25.3515	9.3	72	25	0
2018-12-10	296	0	0	36	168	66.8	23.6678	0	0	74	50	16.2	1.07	80000	1	7	7	1	0	0	1	2	1	39	60	170	20.7612	23.1	31.3	27.4	0
2020-01-14	297	0	0	49	168	74	26.2188	0	1	53	38.7	16.6	1.19	520.48	1	8	5	1	0	0	1	3	1	55	75	174	24.7721	23.3	20	18	0
2016-11-20	298	0	1	52	160	55	21.4844	0	1	59	33	30	1.07	1368000	1	9	6	1	0	0	1	2	1	36	70	175	22.8571	78.1	286	181	0
2017-04-01	299	0	0	64	170	68	23.5294	0	0	69	30.7	77.3	1.21	22647.5	1	14	10	1	383	1	0	2	0	32	65	155	27.0552	41.5	24	34	0
2017-06-12	300	0	0	52	170	82	28.3737	0	0	76	41.4	19.2	0.97	22270.6	1	7	5	1	100	0	0	2	0	22	52	156	21.3675	4.8	86	67	0
2017-08-08	301	0	0	52	160	85	33.2031	0	0	76	44	16.1	1.11	1959.02	1	8	5	1	0	0	0	3	1	42	70	170	24.2215	8.4	37	52	0
2018-10-15	302	0	0	71	170	70	24.2215	1	0	49	30.4	27.8	1.24	248172	1	11	6	1	100	0	1	3	1	49	65	170	22.4913	58	34	16	0
2015-11-23	303	0	0	56	168	63	22.3214	0	0	77	29	19.1	1.16	5.71	0	9	7	1	0	0	1	2	1	51	85	170	29.4118	66.4	168	95	0
2019-12-03	304	0	0	46	156	60	24.6548	1	0	61	38.7	18.2	1.12	2.76	0	8	5	1	0	0	1	1	0	51	60	158	24.0346	18	45	46	0
2018-03-24	305	0	0	63	180	90	27.7778	0	0	53	46.3	15.4	1.01	154.42	0	7	5	1	100	0	1	1	1	43	65	170	22.4913	45.5	160	160	0
2017-03-10	306	0	0	59	170	65	22.4913	0	1	48	48	87	1.24	7.22	0	15	8	1	0	0	1	2	1	49	78	173	26.0617	6.6	232	104	0
2020-03-04	307	0	0	44	175	67	21.8776	0	0	76	37	19.7	1.31	247.92	0	10	6	1	0	0	1	1	1	58	65	165	23.8751	11.2	45	27	0
2019-04-04	308	0	0	59	165	65	23.8751	1	0	69	20	18.5	1.12	3.18	0	8	12	1	0	0	1	1	1	44	55	170	19.0311	13.1	52	35	0
2020-02-10	309	0	0	70	156	51	20.9566	1	0	62	33	85.9	1.09	170.45	0	13	8	1	0	0	0	2	1	52	65	163	24.4646	15.3	35	24	0
2018-06-12	310	0	0	49	168	75	26.5731	0	0	58	31.6	23.3	1.23	132.89	0	10	6	1	100	0	0	3	1	53	60	165	22.0386	9.9	318	107	0
2020-03-03	311	0	0	55	168	72	25.5102	1	0	63	32	33.6	1.25	111.79	0	11	6	1	0	0	1	1	1	57	60	165	22.0386	16.1	22	16	0
2019-12-11	312	0	0	41	159	54	21.3599	1	0	61	35.3	17.4	1.06	274.17	0	7	5	1	0	0	1	2	1	32	60	170	20.7612	20.1	43	23	0
2020-03-10	313	0	0	44	165	70	25.7117	0	1	65	25.4	39.9	1.58	25.72	0	15	9	1	0	0	1	1	0	44	65	160	25.3906	16.8	24	23	0
2018-10-19	314	0	0	26	170	70	24.2215	1	0	72	34	10.8	1.02	2428.92	1	7	6	1	100	0	0	2	1	28	65	170	22.4913	38.2	22	12	0
2017-11-01	315	0	0	61	151	59	25.8761	1	0	58	43.1	11.4	1.04	15.46	0	7	5	1	581	1	1	2	0	7	17.5	120	12.1528	8.6	110	48	0
2016-06-05	316	0	0	59	170	74	25.6055	0	1	80	36.1	23.6	1.02	6.68	0	8	7	1	0	0	1	1	1	31	75	170	25.9516	21.1	134	69	0
2020-03-10	317	0	0	57	178	77	24.3025	0	0	72	39	9.1	2.56	1.53	0	17	5	1	0	0	1	2	1	32	70	175	22.8571	80	124	368	0
2020-03-05	318	0	0	52	166	60	21.7738	0	0	70	32.5	96.2	1.21	11.56	0	15	8	1	0	0	1	3	1	40	62	163	23.3355	69.1	40	45	0
2017-03-14	319	0	0	52	164.5	57	21.0641	0	1	56	32.4	52.6	1.23	13.99	0	13	9	1	100	0	1	1	1	37	18	100	18	50.7	488	226	0
2018-06-18	320	0	0	45	168	55	19.487	0	1	34	39.4	31	1.37	801.43	1	12	7	1	1580	1	1	2	1	36	70	172	23.6614	39.7	176	114	0
2018-12-02	321	0	0	67	170	68	23.5294	1	0	163	37.2	282.4	2.11	10.5	0	31	10	1	0	0	1	2	0	17	52	160	20.3125	15.1	88	144	0
2016-03-22	322	0	0	61	165	60	22.0386	0	0	85	30	40	1.6	20	0	15	8	1	0	0	1	1	0	14	65	160	25.3906	18.9	44	32	0
2020-03-20	323	0	0	56	163	54	20.3244	0	0	50	43.7	21.6	1.18	263.37	0	9	5	1	0	0	1	2	0	46	57	155	23.7253	10	26	23	0
2017-06-27	324	0	0	51	168	60	21.2585	1	1	85	33.4	37.9	1.24	3566.95	1	12	7	1	100	0	1	3	0	12	35	150	15.5556	14.3	40	23	0
2015-10-10	325	0	0	38	172	70	23.6614	0	1	71	41.8	59.6	13.3	4801.65	1	40	6	1	0	0	0	1	0	58	50	155	20.8117	85	127	59	0
2018-06-27	326	0	0	58	174	81.5	26.919	0	1	77	40	18.7	1.15	5.28	0	8	5	1	100	0	1	2	1	38	65	165	23.8751	18	56	30	0
2020-03-19	327	0	0	50	173	70	23.3887	0	0	52	11	16.1	1.12	94.33	0	8	7	1	0	0	1	3	1	15	50	165	18.3655	11.5	66	49	0
2018-04-19	328	0	0	56	170	70	24.2215	0	0	51	28	49.3	1.85	6.77	0	17	9	1	100	0	0	1	1	49	65	158	26.0375	3.5	13	37	0
2016-03-15	329	0	0	61	172	77	26.0276	0	0	96	31	150.3	1.46	1362950	1	32	9	1	0	0	1	3	1	58	70	170	24.2215	39.5	74	57	0
2019-12-12	330	0	0	40	183	79	23.5898	0	1	89	47	14.7	2.75	1.4	0	18	5	1	0	0	0	1	1	26	60	170	20.7612	5.93	173	84	0
2016-11-18	331	0	0	49	168	69	24.4473	0	0	100	29.8	22.2	1.09	1007800	1	10	7	1	14600	1	1	3	0	35	50	158	20.0288	43.8	942	656	0
2019-11-19	332	0	0	65	163	52	19.5717	0	0	243	35.9	483.3	3.07	4.36	0	40	11	1	0	0	1	1	1	51	50	155	20.8117	22.1	26	18	0
2017-12-23	333	0	0	34	165	60	22.0386	1	0	57	38.3	330.9	1.48	1339850	1	22	12	1	17400000	1	1	3	1	58	75	170	25.9516	40.7	43	25	0
2018-10-04	334	0	0	50	170	68	23.5294	0	1	103	33.9	9.5	0.98	7.58	0	8	6	1	100	0	1	2	1	49	80	172	27.0416	12.7	76	35	0
2017-03-29	335	0	1	46	150	39	17.3333	0	0	78	30.6	544.8	1.83	1.41	0	26	12	1	0	0	0	2	1	3	12.5	90	15.4321	9.2	52	28	0
2017-09-13	336	0	0	47	168	61	21.6128	0	1	92	49	17.3	1.03	328.55	0	7	7	1	6350	1	0	1	0	55	65	170	22.4913	34	56	28	0
2019-07-16	337	0	0	55	163	68	25.5937	1	1	77	42.6	23.7	1.05	5.88	0	8	5	1	0	0	1	1	1	30	65	158	26.0375	33	76	33	0
2017-03-17	338	0	0	51	174	90	29.7265	0	0	48	33.7	46.7	1.46	7.58	0	14	7	1	0	0	0	1	1	24	70	171	23.939	34.6	141	79	0
