# Supplementary material for: Utilization of hepatitis B surface antigen-positive donors in liver transplantation for recipients with hepatocellular carcinoma: a retrospective and propensity score matching analysis
Source: PeerJ. 2023 Jul 26;11:e15620. doi: 10.7717/peerj.15620 (PMC10386819; doi:10.7717/peerj.15620)
Supplement: Data S2 [file peerj-11-15620-s002.xlsx]

## Sheet: Sheet1
Recipients' characteristics																							Donors' characteristics									Surgery										Post-surgery complications
date of transplantation	ID	group	gender	age	height	weight	BMI	RFA history	TACE history	CREA	ALB	TBIL	INR	AFP	AFP>400	MELD	Child-Pugh	HBsAg	HBV-DNA	DNA>100	DBD	TNM staging	gender	age	weight	height	BMI	TBIL	AST	ALT	HBsAg	anhepatic phase	cold ischema time	duration of arterial anastomosis	surgery duration	RBC transfusion	FFP transfusion	PLT transfusion	Blood loss	cardiac arrest	hypotension(HBP<=60mmHg)	recurrence of hcc	date of HCC recurrence	tumor-free survival	last follow-up date	total survival	dead	HBsAg (+)	date of HB recurrence
2015-01-22	1	1	0	52	165	51	18.7328	0	0	89	47.5	43	1.57	428.34	1	15	9	1	0	0	1	1	1	42	73	165	26.8136	41.5	181	55	1	59	6	71	7	4	6.25	2	600	0	0	0	2019-12-23	1796	2019-12-23	1796	0	negative	no recur
2015-05-06	2	1	0	53	170	57	19.7232	0	1	206	44.9	103.6	4.36	5.97	0	38	9	1	0	0	1	2	1	44	75	175	24.4898	20.8	23	7	1	38	13		7	12	1.5	1	5500	0	0	0	2019-05-20	1475	2019-05-20	1475	0	positive	2015-08-04
2015-10-28	3	1	0	66	171	62	21.2031	0	0	79	39.9	22.5	1.12	3.53	0	9	8	1	0	0	0	1	0	19	51	152	22.0741	19.9	42	110	1	45	4	48	7	5	5.5	0	1000	0	0	1	2019-04-13	1263	2020-08-01	1739	0	negative	no recur
2017-03-26	4	1	0	62	168	71	25.1559	1	0	81	39.6	28.4	1.19	1.94	0	10	5	1	100	0	0	2	1	35	60	170	20.7612	12.7	102	149	1	60	11	30	9	6	10	2	3000	0	1	0	2020-01-03	1013	2020-01-03	1013	0	negative	no recur
2017-05-05	5	1	1	39	165	59	21.6713	0	1	50	35.7	9.3	0.9	5831.73	1	6	5	1	100	0	1	2	0	29	50	156	20.5457	16.2	35	23	1	60	5	65	7	0	5	0	500	0	0	0	2019-12-16	955	2019-12-16	955	0	negative	no recur
2017-09-08	7	1	0	55	180	74	22.8395	0	0	91	39	12	0.98	84.61	0	7	5	1	100	0	0	1	1	27	65	170	22.4913	7	37	49	1	35	8	44	5	2	5.25	0	500	0	0	0	2019-12-27	840	2019-12-27	840	0	negative	no recur
2017-09-06	9	1	0	41	175	70	22.8571	0	1	80	39.7	15.8	1.14	3.73	0	8	5	1	100	0	1	2	1	43	67	168	23.7387	41	52	29	1	59	9		6	2	3.5	0	1000	0	0	0	2019-07-31	693	2019-07-31	693	0	negative	no recur
2017-05-22	10	1	0	40	170	59	20.4152	0	1	59	43	20.9	1.11	9.41	0	8	6	1	100	0	1	2	1	40	73	170	25.2595	33.9	149	257	1	58	5	141	8	5	6.5	0	1500	0	0	0	2019-04-08	686	2019-04-08	686	0	negative	no recur
2017-10-26	11	1	0	62	170	67.5	23.3564	0	0	114	41	14.2	1.01	2.34	0	9	6	1	100	0	1	1	1	34	65	165	23.8751	33.7	37	24	1	61	6	115	7	0	0.5	0	1200	0	0	1	2019-08-27	670	2019-08-27	670	0	negative	no recur
2015-10-17	12	1	0	65	163	54	20.3244	0	1	167	40.1	117.9	1.78	5.65	0	26	6	1	0	0	1	2	1	3	15	100	15	2.5	63	73	1	58	11	69	12	4	12.25	0	800	0	0	1	2017-06-13	605	2019-07-07	1359	0	negative	no recur
2018-03-13	13	1	0	46	170	61.5	21.2803	0	0	56	39.4	422.1	2.85	21.42	0	30	11	1	1150000	1	1	2	1	24	62	175	20.2449	13.8	31	37	1	57	6	69	7	8	14	1	3000	0	0	1	2019-10-11	577	2019-10-11	577	0	negative	no recur
2017-05-26	14	1	0	58	165	65	23.8751	0	0	55	26	18.8	1.27	25.84	0	9	8	1	2380000	1	0	3	0	48	60	158	24.0346	6.3	42	40	1	54	5	80	6	14.95	5.5	0	500	0	0	1	2018-12-20	573	2019-08-09	805	1	negative	no recur
2017-07-19	16	1	0	38	165	67	24.6097	0	0	52	35.9	42.9	1.21	581.1	1	12	7	1	2090	1	1	3	0	21	66	163	24.841	36.3	14	17	1	75	9	94	7	7	6	0	2000	0	0	0	2018-12-05	504	2018-12-05	504	0	negative	no recur
2016-12-19	17	1	0	65	170	70	24.2215	0	0	77	33.8	11.4	1.11	3452.29	1	8	6	1	14500	1	0	2	1	48	65	165	23.8751	13.34	60	50	1	65	9	80	6	0	4	0	800	0	0	1	2018-04-23	490	2019-01-25	767	0	negative	no recur
2016-10-13	18	1	0	56	168	60	21.2585	0	0	90	18.6	156.4	1.4	154.77	0	19	11	1	0	0	1	2	1	18	50	160	19.5312	29	62	55	1	74	7	80	8	10.5	11	0	5000	0	0	1	2018-01-09	453	2019-09-16	1068	0	positive	2016-11-28
2017-10-30	19	1	0	51	168	70	24.8016	0	1	61	31	22.8	1.19	12.46	0	9	8	1	0	0	1	1	1	27	65	172	21.9713	15.9	100	74	1	41	16	54	8	0	2	0	600	0	0	1	2019-01-14	441	2019-01-22	449	0	negative	no recur
2018-08-11	20	1	0	72	170	63	21.7993	0	0	79	33	37.5	1.01	7.73	0	10	6	1	0	0	1	2	1	21	65	168	23.03	14.27	72.5	53.9	1	53	5	35	7	3	12	0	2300	0	0	0	2019-10-16	431	2019-10-16	431	0	negative	no recur
2018-08-19	21	1	1	62	155	62	25.8065	0	1	76	32.1	12	1.12	523.27	1	8	6	1	298000	1	1	1	0	47	49	158	19.6283	35.8	145	149	1	30	4	100	5	4	5	0	1000	0	0	0	2019-10-22	429	2019-10-22	429	0	negative	no recur
2016-06-13	23	1	1	58	165	55	20.202	1	1	56	32.5	29	1.03	5.25	0	9	6	1	0	0	1	2	1	41	55	165	20.202	12.6	48	36	1	98	7	90	12	10	11	0	3500	0	0	1	2017-07-12	394	2018-08-14	792	0	negative	no recur
2018-09-21	24	1	0	28	175	78	25.4694	0	0	78	39.6	11	1.05	6.49	0	7	5	1	100	0	1	2	1	46	65	170	22.4913	16.2	96	23	1	65	11	60	10	4	4.5	0	4000	0	1	0	2019-09-18	362	2019-09-18	362	0	negative	no recur
2019-02-13	25	1	0	51	172	73	24.6755	0	0	260	37.4	346	1.21	423	1	30	9	1	0	0	1	1	1	45	55	170	19.0311	68.1	49	28	1	51	0		7	5	3	0	2200	0	0	0	2020-01-15	336	2020-01-15	336	0	negative	no recur
2019-09-28	26	1	0	62	164	53	19.7055	0	0	152	36.2	662	2.27	3.76	0	35	10	1	0	0	1	1	1	41	70	160	27.3437	15.1	39	28	1	57	7	89	8	24	19.25	12	13000	0	0	0	2020-08-01	308	2020-08-01	308	0	negative	no recur
2018-07-18	27	1	0	65	168	58	20.5499	0	0	290	32	256	2	1219.84	1	36	11	1	0	0	1	2	1	31	70	172	23.6614	12.9	47	19	1	30	5	47	6	4	3.75	0	1000	0	0	1	2019-05-18	304	2019-09-30	439	0	negative	no recur
2018-10-30	28	1	0	45	173	77	25.7276	0	1	64	37	31.6	1.07	6.57	0	10	5	1	100	0	1	2	1	38	70	175	22.8571	18.6	32	13	1	38	7	19	7	3	5	1	1000	0	0	0	2019-08-26	300	2019-08-26	300	1	negative	no recur
2019-10-22	29	1	0	67	168	95	33.6593	0	0	68	38.8	19	1.15	1.3	0	8	7	1	0	0	0	1	1	47	80	170	27.6817	7.8	46	43	1	40	7	74	6	11.5	3	0	1500	0	0	1	2020-08-01	284	2020-08-01	284	0	negative	no recur
2019-03-20	30	1	0	56	167	61	21.8724	0	0	81	41.9	24.4	1.32	18.26	0	11	8	1	0	0	1	2	1	45	60	170	20.7612	23.3	124	84	1	40	6	76	7	0	9.75	1	1350	0	0	0	2019-12-17	272	2019-12-17	272	0	negative	no recur
2015-06-29	31	1	0	49	165	70.5	25.8953	1	0	86	34.5	201.6	8.2	180.55	0	39	8	1	0	0	1	3	1	28	55	167	19.721	42	123	53	1	63	10	40	7	10	6.25	0	500	0	0	1	2016-03-18	263	2016-05-26	332	0	positive	2015-08-20
2019-11-28	32	1	0	37	168	100	35.4308	0	1	62	32.8	27.4	1.18	11.73	0	10	6	1	0	0	1	1	1	43	62.5	165	22.9568	28.9	19	14	1	36	5	70	7	0	9	0	500	0	0	0	2020-08-01	247	2020-08-01	247	0	negative	no recur
2019-04-30	33	1	0	43	171	80	27.3588	0	0	81	50	9.8	0.92	28.73	0	6	7	1	0	0	0	1	1	36	55	165	20.202	13.2	136	78	1	90	6	81	8	0	7.5	0	800	0	0	0	2019-12-02	216	2019-12-02	216	0	negative	no recur
2019-04-24	34	1	0	53	175	70	22.8571	0	0	92	33.2	65.8	1.21	20.74	0	14	10	1	0	0	0	3	1	44	65	170	22.4913	16.6	204.3	54	1	61	8	135	9	13.8	6	0	6000	0	0	0	2019-11-05	195	2019-11-05	195	0	negative	no recur
2019-11-22	36	1	0	51	168	60	21.2585	0	0	41	34.2	11.1	1.16	2716.28	1	8	7	1	0	0	1	1	1	53	65	165	23.8751	15.7	28	20	1	65	6	110	7	5	0.75	0	1500	0	1	1	2020-03-19	118	2020-03-19	118	0	negative	no recur
2019-09-24	37	1	0	43	174	78	25.763	0	0	68	41.8	64	1.18	4111.32	1	13	7	1	0	0	1	2	1	44	60	168	21.2585	20.2	31	15	1	60	7	95	8	0	2	0	800	0	0	0	2020-01-07	105	2020-01-07	105	0	negative	no recur
2019-10-17	39	1	0	41	172	70	23.6614	0	0	63	36.7	18	1.07	90.36	0	7	5	1	0	0	1	2	1	27	65	170	22.4913	13.8	60	22	1	50	7	81	6	4.6	6.5	0	1000	0	0	0	2019-12-16	60	2019-12-16	60	0	negative	no recur
2017-04-29	40	1	0	45	170	82	28.3737	0	0	80	45.8	18.2	0.97	209.8	0	7	5	1	76000	1	0	3	1	51	60	165	22.0386	16	30	42	1	60	8	190	12	16.75	20.25	0	12000	0	0	1	2017-06-17	49	2018-08-06	464	1	negative	no recur
2018-07-18	41	1	0	34	173	70	23.3887	1	1	66	33.1	8.2	0.98	320911	1	6	6	1	3590000	1	1	3	1	50	60	170	20.7612	23.7	72	80	1	29	6	72	6	0	0.5	0	500	0	0	1	2018-08-30	43	2019-09-07	416	0	negative	no recur
2017-12-22	42	1	0	50	167	78	27.968	0	0	55	31.1	56.3	1.27	-2	0	14	10	1	25000	1	0	1	1	42	70	168	24.8016	8.9	24	21	1	71	5	95	8	8	13	0	1500	0	0	1	2018-01-31	40	2018-11-13	326	1	negative	no recur
2018-09-22	43	1	0	39	170	68	23.5294	1	0	56	36	37.6	1.17	1207.16	1	11	6	1	100	0	1	1	1	35	75	170	25.9516	12.9	87	51	1	61	5	62	6	0	8.25	1	400	0	0	1	2018-10-24	32	2019-10-08	381	0	negative	no recur
2017-11-08	44	1	0	46	178	84	26.5118	0	0	58	39.6	14.2	1.05	1160	1	7	5	1	499	1	1	1	0	24	60	162	22.8624	12	69	53	1	49	10	80	7	4	5	0	2000	0	0	1	2017-12-05	27	2019-09-16	677	0	negative	no recur
2015-03-27	45	1	0	32	170	68	23.5294	0	0	568	42.2	436	2.05	99.45	0	40	9	1	0	0	0	2	1	27	65	170	22.4913	48.2	199	153	1	95	9	93	11	20	10	0	5000	0	0	0	2015-04-18	22	2015-04-20	24	1	negative	no recur
2017-12-11	47	1	0	42	174	72	23.7812	1	0	64	44.9	14.1	0.96	450.46	1	6	7	1	100	0	0	2	1	45	80	170	27.6817	37.4	101	69	1	54		139		2	3.75	0	3200	0	0	0	2017-12-26	15	2017-12-26	15	1	negative	no recur
2020-03-29	48	1	0	31	170	65	22.4913	1	0	93	41.5	16.6	1.05	3.47	0	7	5	1	0	0	1	3	1	50	65	172	21.9713	8.4	50	49	1	51	8	92	7	0	9	1	300	0	0	0	2020-04-10	12	2020-04-10	12	0	negative	no recur
2017-05-03	49	1	0	49	170	68	23.5294	0	0	108	41.2	553.3	1.22	4200.28	1	24	10	1	788	1	0	1	1	39	55	170	19.0311	21.6	47	32	1	51	6	73	7	3	9	1	2500	0	0	0	2017-05-14	11	2017-05-14	11	1	negative	no recur
2018-02-06	50	1	0	38	165	75	27.5482	0	0	83	35	10.8	1.09	5936.77	1	7	6	1	196000	1	1	1	1	35	60	168	21.2585	25.6	59	71	1	32	7	139	6	2.3	8.75	0	1200	0	0	0	2018-02-15	9	2018-02-15	9	1	negative	no recur
2020-04-11	51	1	0	62	170	65	22.4913	1	0	64	37.8	10.7	1.03	1.58	0	7	5	1	0	0	1	2	1	53	60	170	20.7612	19.7	36	32	1	60	0		6					0	0	0	2020-04-13	2	2020-04-13	2	0	negative	no recur
2015-12-24	56	0	0	49	164	57	21.1927	0	0	53	34	21.1	1.41	10.09	0	11	7	1	0	0	0	1	1	26	62	170	21.4533	17.1	70	33	0	62	6	57	8	6	8	1	1200	0	0	0	2020-03-13	1541	2020-03-13	1541	0	negative	no recur
2015-12-04	57	0	0	48	169	74.5	26.0845	0	1	73	33.9	56.5	1.36	2.38	0	14	8	1	100	0	1	1	1	45	67	172	22.6474	80.4	276	93	0	76	11	89	10	6	9	0	1000	0	0	0	2020-02-10	1529	2020-02-10	1529	0	negative	no recur
2015-04-16	58	0	0	50	170	64	22.1453	1	0	186	39.8	86.6	3.42	39.79	0	33	10	1	0	0	1	2	1	45	75	175	24.4898	13.4	130	47	0	64	10	84	8	6	8.75	1	1500	0	0	0	2019-06-11	1517	2019-06-11	1517	0	negative	no recur
2015-11-03	59	0	0	54	160	61	23.8281	0	0	59	34	16.5	1.2	15.16	0	8	9	1	0	0	0	1	1	16	50	170	17.301	16.2	74	21	0	44	5	84	8	1	7	1	400	0	0	0	2019-11-13	1471	2019-11-13	1471	0	negative	no recur
2015-12-26	60	0	0	52	160	62	24.2187	1	0	69	43.6	89.3	1.08	3.44	0	14	9	1	0	0	1	2	1	21	65	170	22.4913	11.4	102	67	0	61	6	110	9	3	9	1	1500	0	0	0	2019-11-08	1413	2019-11-08	1413	0	negative	no recur
2015-08-26	61	0	0	61	168	77	27.2817	0	1	76	41.4	30.6	3.12	11.15	0	21	8	1	0	0	1	1	1	33	65	175	21.2245	47.4	123	44	0		9	68	11	28	11.5	1	3000	0	0	0	2019-05-20	1363	2019-05-20	1363	0	negative	no recur
2016-05-19	63	0	0	64	170	60	20.7612	0	0	82	34.9	31.3	1.14	15.17	0	10	6	1	0	0	1	2	0	36	50	155	20.8117	14.5	69	27	0	76	12	82	7	2	0.5	0.5	500	0	0	0	2020-01-20	1341	2020-01-20	1341	0	negative	no recur
2016-02-25	64	0	0	45	170	80	27.6817	0	1	68	26.3	27.9	1.34	185.55	0	12	7	1	92200	1	0	1	1	18	55	165	20.202	14.6	48	35	0	67	6	175	10				1500	0	0	0	2019-10-28	1341	2019-10-28	1341	0	negative	no recur
2016-05-10	65	0	0	59	168	68	24.093	0	0	72	361	12.9	0.98	5.31	0	6	7	1	0	0	1	2	1	39	80	170	27.6817	13.8	95	66	0	46	11	115	8	2	10.25	0	1800	0	0	0	2019-10-17	1255	2019-10-17	1255	0	negative	no recur
2016-05-04	66	0	0	62	163	57.5	21.6418	0	1	79	43	16.9	1.09	304.4	0	7	5	1	0	0	1	2	1	8	28	120	19.4444	8.3	104	45	0	80	8	51	8	0	5	0.5	800	0	0	0	2019-09-04	1218	2019-09-04	1218	0	negative	no recur
2016-05-19	68	0	0	26	167	67	24.0238	0	0	67	37.8	19.4	1.79	68	0	13	9	1	0	0	1	2	1	26	60	175	19.5918	47	153	42	0	43	6	53	7	4	3.75	2	500	0	0	0	2019-09-06	1205	2019-09-06	1205	0	negative	no recur
2016-07-03	69	0	0	64	170	59	20.4152	0	0	118	28.9	34.5	1.77	108.5	0	18	11	1	0	0	0	2	0	9	22	128	13.4277	5.9	74	80	0	85	5	110	8	6	7	1	1750	0	0	0	2019-10-16	1200	2019-10-16	1200	0	negative	no recur
2016-03-10	71	0	0	59	172	80	27.0416	0	0	86	31.9	26.9	1.19	119.06	0	10	7	1	24600	1	1	1	1	32	55	168	19.487	16	30	20	0	85	12	67	13	2	5	0	1000	0	0	0	2019-05-30	1176	2019-05-30	1176	0	negative	no recur
2017-05-27	72	0	0	58	171	61	20.8611	1	0	71	34.9	11.8	1.08	6533.92	1	7	6	1	376	1	1	1	1	23	55	165	20.202	18	585	280	0	36	5	73	6	0	6	0	600	0	0	1	2020-08-03	1164	2020-08-03	1164	0	negative	no recur
2016-10-14	73	0	1	61	156	57	23.4221	0	0	63	29.6	33.2	1.15	2.66	0	11	7	1	0	0	1	1	1	51	65	175	21.2245	11.1	162	79	0	60	5	110	9	17	18	1	7000	0	0	0	2019-12-20	1162	2019-12-20	1162	0	negative	no recur
2015-02-22	77	0	0	63	168	73	25.8645	0	0	81	35.3	21.1	1.16	3.23	0	9	7	1	0	0	1	2	1	20	50	170	17.301	52.4	79	46	0	63	8	30	7	12	13	0	2000	0	0	1	2018-03-01	1103	2018-07-31	1255	0	negative	no recur
2017-02-16	79	0	0	54	178	76	23.9869	0	0	84	40	53.1	1.33	16.56	0	14	7	1	0	0	1	2	0	34	55	158	22.0317	22.8	107	74	0	69	10	121	10	12	13	0	5500	0	0	0	2020-01-17	1065	2020-01-17	1065	0	negative	no recur
2016-08-26	80	0	0	54	165	55	20.202	1	0	61	34.3	19.4	1.02	7.15	0	7	6	1	0	0	0	2	1	19	50	168	17.7154	17.4	81	60	0	31	4	33	8	0	6.5	1	500	0	0	0	2019-07-09	1047	2019-07-09	1047	0	negative	no recur
2017-01-02	84	0	0	68	167	65	23.3067	0	0	68	33.2	6.6	1.06	2.46	0	7	6	1	6640	1	1	1	1	65	55	162	20.9572	21.2	43	38	0	70	6	141	11	6	6.25	0	1500	0	0	1	2019-10-17	1018	2019-10-17	1018	0	negative	no recur
2016-05-26	85	0	0	60	173	70	23.3887	0	1	58	39	46	1.18	-2	0	12	9	1	0	0	1	2	1	40	68	170	23.5294	18.3	35	24	0	57	4	116	6	0	9.75	2	3000	0	0	0	2019-03-08	1016	2019-03-08	1016	0	negative	no recur
2017-03-29	88	0	1	36	163	70	26.3465	0	1	60	37.5	10	0.99	70743.9	1	6	5	1	100	0	0	1	1	14	51	140	26.0204	8.1	25	8	0	28	6	74	6	1	0	0	1200	0	0	0	2019-12-30	1006	2019-12-30	1006	0	negative	no recur
2016-12-14	92	0	0	61	185	55	16.0701	1	0	70	27.4	20.6	1.4	3.81	0	11	7	1	100	0	0	2	1	50	50	165	18.3655	6.3	6	3	0	98	10	135	9	10	12	1	3000	0	0	0	2019-08-06	965	2019-08-06	965	0	negative	no recur
2016-09-22	93	0	0	60	169	63	22.0581	0	0	62	34.3	53.3	1.29	16.26	0	14	8	1	174	1	0	1	1	36	70	175	22.8571	8.2	158	64	0	48	6	71	7	4.6	5.5	1	1500	0	0	0	2019-04-29	949	2019-04-29	949	0	negative	no recur
2017-05-04	94	0	0	62	172	65	21.9713	0	0	82	35.8	40.9	1.14	11.53	0	11	6	1	64.9	0	1	2	1	47	70	170	24.2215	27.8	94	132	0	45	4	85	7	3	9	1	2500	0	0	0	2019-12-04	944	2019-12-04	944	0	negative	no recur
2017-07-02	95	0	1	47	162	51	19.433	1	1	71	48	15.6	0.99	26.44	0	6	5	1	100	0	1	2	0	35	55	160	21.4844	24.1	26	65	0	58	12	90	7	10	7	1	800	0	0	1	2019-11-29	880	2019-11-29	880	0	negative	no recur
2015-12-23	96	0	0	52	174	68	22.46	1	1	78	45	23.2	0.97	3.25	0	8	5	1	0	0	1	1	0	45	58	160	22.6562	17.2	102	109	0	72	7	21	9	4	4	0	2000	0	0	1	2018-05-18	877	2020-02-10	1510	0	negative	no recur
2017-09-21	103	0	0	46	168	63	22.3214	1	0	74	36.1	46.6	1.55	4.68	0	15	7	1	100	0	0	2	1	37	65	170	22.4913	7.6	142.2	149.1	0	59	7	133	8	4	13.5	0	1000	0	0	0	2019-11-20	790	2019-11-20	790	0	negative	no recur
2015-07-04	105	0	0	64	158	76	30.4438	0	0	53	26.1	81	2.68	82.03	0	23	12	1	0	0	1	3	1	35	85	175	27.7551	22.6	114	27	0	54	7	36	8	27	20	0	6000	0	0	1	2017-08-09	767	2018-07-22	1114	0	negative	no recur
2017-05-10	107	0	0	30	162	70	26.6728	0	0	82	43	18	1.14	10415.3	1	8	5	1	9690	1	1	2	1	50	65	168	23.03	56.7	98	65	0	36	9	75	6	2	5	0	600	0	0	0	2019-04-22	712	2019-04-22	712	0	negative	no recur
2017-09-02	108	0	0	59	160	48	18.75	0	0	77	35.9	23.3	1.19	6.15	0	10	6	1	100	0	0	2	1	66	60	155	24.974	18.7	27	15	0	54	9	47	7	4	5	0	1180	0	0	0	2019-08-05	702	2019-08-05	702	0	negative	no recur
2017-11-18	111	0	0	44	171	64	21.8871	1	1	89	49	15.9	0.84	31.36	0	6	5	1	100	0	1	2	1	22	60	170	20.7612	2.1	4	26	0	61	3	78	7	0	2.5	0	1000	0	0	0	2019-10-08	689	2019-10-08	689	0	negative	no recur
2015-07-28	113	0	0	40	172	65	21.9713	0	0	162	44.9	147.4	2.16	949.4	1	29	10	1	0	0	1	1	1	33	55	170	19.0311	66.9	116	40	0	66	6	41	7	2	0.75	0	800	0	0	1	2017-06-06	679	2019-06-13	1416	0	negative	no recur
2017-07-18	115	0	0	42	170	70	24.2215	0	0	70	42.5	13.6	1.01	1.09	0	7	5	1	0	0	1	2	0	45	35	153	14.9515	10.8	29	15	0	77	12	158	10	8	11.25	0	2500	0	0	0	2019-05-27	678	2019-05-27	678	0	negative	no recur
2017-10-24	118	0	0	46	170	77.5	26.8166	0	1	69	32.4	26.9	1.14	55.14	0	10	8	1	100	0	0	2	1	41	70	173	23.3887	25	67	33	0	90	9	130	8	4	8	2	1500	0	0	0	2019-08-20	665	2019-08-20	665	0	negative	no recur
2016-07-21	124	0	1	59	160	66	25.7812	0	1	60	39.5	18.2	0.92	4.26	0	7	5	1	5280	1	1	1	1	50	60	165	22.0386	31.4	86	64	0	63	8	66	7	2.3	6.75	0	1500	0	0	0	2018-04-23	641	2018-04-23	641	0	negative	no recur
2017-09-12	127	0	0	27	172	60	20.2812	0	0	59	24	78	1.54	49.82	0	17	10	1	100	0	1	3	1	50	65	167	23.3067	39.5	94	36	0	30	0		7	3	12	1	2500	0	1	0	2019-06-05	631	2019-06-05	631	0	negative	no recur
2018-05-26	143	0	0	47	170	68	23.5294	1	0	78	37.6	17.7	1.19	96.53	0	9	5	1	100	0	1	2	1	14	60	170	20.7612	15.2	143	66.2	0	43	10		7	2.3	7.75	0	4000	0	0	1	2019-10-14	506	2019-10-14	506	1	negative	no recur
2017-12-08	150	0	0	47	178	80	25.2493	0	1	157	37	19.9	1.21	75.12	0	22	6	1	100	0	1	1	0	41	60	160	23.4375	44.3	46	42	0	61	7	90	7	9	7.5	0	2500	0	0	0	2019-04-04	482	2019-04-04	482	0	negative	no recur
2019-07-13	170	0	0	60	176	82	26.4721	0	0	74	35.1	53.3	1.44	9.74	0	15	7	1	0	0	1	2	1	42	70	173	23.3887	15.4	20.8	19.6	0	64	9	107	6	6	0	0	300	1	1	0	2020-08-01	385	2020-08-01	385	0	negative	no recur
2019-08-25	179	0	0	51	168	69	24.4473	0	0	86	33.6	17.7	1.11	137.12	0	8	6	1	0	0	1	3	1	8	21	127	13.02	11.2	37	9	0	38	9	36	9	10	11.9	0	5000	0	0	0	2020-08-01	342	2020-08-01	342	0	negative	no recur
2018-01-03	278	0	0	34	180	110	33.9506	0	0	62	46.5	30.6	1.16	32070.7	1	10	5	1	325	1	1	2	1	46	65	170	22.4913	36.7	18	26	0	59	8	87	7	0	0	0	200	0	0	1	2018-04-13	100	2019-08-14	588	0	negative	no recur
2019-02-11	280	0	0	50	170	70	24.2215	0	0	163	38	462.2	2.21	13058.3	1	34	9	1	0	0	1	2	1	23	56	173	18.7109	73	760	42	0	43	5	74	7	6	8	2	1500	0	0	1	2019-05-20	98	2019-11-18	280	1	negative	no recur
2019-02-03	291	0	0	44	171	65	22.2291	0	0	162	33	566.4	2.47	13821.3	1	36	9	1	0	0	1	3	1	33	70	175	22.8571	14.7	115.4	93.1	0	55	5	111	9	2	7	0	1500	0	0	1	2019-04-15	71	2019-07-17	164	1	negative	no recur
2017-08-08	301	0	0	52	160	85	33.2031	0	0	76	44	16.1	1.11	1959.02	1	8	5	1	0	0	0	3	1	42	70	170	24.2215	8.4	37	52	0	49	9	66	7	2	3.5	0	700	0	0	1	2017-09-25	48	2018-07-02	328	0	negative	no recur
[truncated: 32 more columns]
