# Supplementary material for: Utilization of hepatitis B surface antigen-positive donors in liver transplantation for recipients with hepatocellular carcinoma: a retrospective and propensity score matching analysis
Source: PeerJ. 2023 Jul 26;11:e15620. doi: 10.7717/peerj.15620 (PMC10386819; doi:10.7717/peerj.15620)
Supplement: Data S4 [file peerj-11-15620-s004.xlsx]

## Sheet: Raw data
Milan Criteria
ID	Number of tumors	Diameter of largest tumor (cm)	Vascular invasion	Tumor thrombosis	Meets Milan Criteria
1	2	6.5			NO
2	1	4.1	NO	NO	YES
3	3	3	NO	NO	YES
4	1	3	NO	NO	YES
5	2	3	NO	NO	YES
7	1	4	NO	NO	YES
9	2	7.4			NO
10	3	3.6			NO
11	1	3	NO	NO	YES
12	2	4.4			NO
13	1	13.2			NO
14	3	7.6			NO
16	2	9.3			NO
17	1	1	NO	NO	YES
18	1	4.5	NO	NO	YES
19	2	5			NO
20	3	3	NO	NO	YES
21	1	0.01	NO	NO	YES
23	1	1.5	NO	NO	YES
24	2	4.1			NO
25	1	12			NO
26	2	17			NO
27	1	6			NO
28	1	3	NO	NO	YES
29	2	7			NO
30	1	11			NO
31	1	5.3			NO
32	1	8.3			NO
33	1	10.1			NO
34	2	6			NO
36	1	15			NO
37	1	2	NO	NO	YES
39	3	6			NO
40	2	3.5			NO
41	2	3	NO	NO	YES
42	2	4			NO
43	1	12			NO
44	2	6			NO
45	3	2	NO	NO	YES
47	1	4	NO	NO	YES
48	1	8			NO
49	1	3	NO	NO	YES
50	1	1	NO	NO	YES
51	2	10			NO
56	2	2	NO	NO	YES
57	3	3	NO	NO	YES
58	1	1.7	NO	NO	YES
59	1	12			NO
60	2	3.5			NO
61	1	10			NO
63	2	12			NO
64	2	2	NO	NO	YES
65	1	8			NO
66	2	4			NO
68	1	6.6			NO
69	3	3	NO	NO	YES
71	2	4			NO
72	2	12			NO
73	1	16			NO
77	1	3	NO	NO	YES
79	1	4	NO	NO	YES
80	1	6			NO
84	2	4.5			NO
85	1	6			NO
88	2	2.5	NO	NO	YES
92	3	3	NO	NO	YES
93	2	3	NO	NO	YES
94	2	3.5			NO
95	2	1	NO	NO	YES
96	1	2	NO	NO	YES
103	2	5			NO
105	3	12			NO
107	3	12			NO
108	1	4	NO	NO	YES
111	2	5			NO
113	2	10			NO
115	1	3	NO	NO	YES
118	1	5.5			NO
124	2	15			NO
127	1	4	NO	NO	YES
143	1	6			NO
150	4	4.3			NO
170	3	8			NO
179	1	0.5	NO	NO	YES
278	2	3.5			NO
280	3	1	NO	NO	YES
291	2	3	NO	NO	YES
301	1	0.5	NO	NO	YES

## Sheet: Statistics
	Object	Meets Milan Criteria		Statistical testing	p value	Significance
		Yes	No
	Anhepatic time			Student's t-test	0.975	NS
	Cold ischemia time				0.583	NS
	Duration of arterial anastomosis				0.699	NS
	Surgery duration				0.758	NS
	Blood loss				0.987	NS
	Rbc transfusion				0.54	NS
	FFP transfusion				0.762	NS
	Ventilation time				0.4	NS
	ICU stay time				0.222	NS
	Peak ALT			t test	0.458	NS
	Peak AST				0.143	NS
	TBIL at POD 7				0.35	NS
	Total survival			Cox proportional hazards regression	0.156	NS
	Graft survival				0.688	NS
	Abdominal bleeding			Fisher's exact test	>0.999	NS
	HAT				0.636	NS
	PVT				0.42	NS
	PNF				0.174	NS
	EAD				>0.999	NS
	Cardiac arrest				>0.999	NS
	Hypotension				>0.999	NS
